# Supplementary material for: 1,3,5,9-Tetra(4-(1,2,2-triphenylvinyl)phenyl)pyrene (TTPE(1,3,5,9)Py): a prominent blue AIEgen for highly efficient nondoped pure-blue OLEDs
Source: Royal Society of Chemistry journal article supplement (doi:10.1039/d0tc04557h), 2020-01-01
Supplement: d0tc04557h1.pdf [file d0tc04557h1.pdf]

## *Supplementary Data for*

# **1,3,5,9-Tetra(4-(1,2,2-triphenylvinyl)phenyl)pyrene (TTPE(1,3,5,9)Py): A Prominent Blue AIEgen for Highly Efficient Nondoped Pure-Blue OLEDs**

*Fuli Xie,<sup>†,‡</sup> Huijuan Ran,<sup>†,‡</sup> Xuwei Duan,<sup>†</sup> Ruijun Han,<sup>†</sup> Huaming Sun,<sup>§</sup> and Jian-Yong Hu<sup>\*,†</sup>*

*<sup>†</sup>Key Laboratory of Applied Surface and Colloid Chemistry, National Ministry of<sup>a</sup>Key Laboratory of Applied Surface and Colloid Chemistry, National Ministry of Education; Shaanxi Key Laboratory for Advanced Energy Devices; Shaanxi Engineering Lab for Advanced Energy Technology, School of Materials Science and Engineering, Shaanxi Normal University, Xian 710119, China.*

*<sup>§</sup>National Demonstration Center for Experimental Chemistry Education, School of Chemistry and Chemical Engineering, Shaanxi Normal University, Xian 710119, China.*

*E-mail: [hujianyong@snnu.edu.cn](mailto:hujianyong@snnu.edu.cn)*

# **Content**

**1. Materials and Instruments**

**2. Synthesis and Characterization**

**3. Device Fabrication**

**4. Thermal Properties**

**5. DFT Calculations**

**6. X-Ray Crystallography**

**7. Photophysical Properties**

**8. PESA Spectra**

**9. Device Performance**

**10. FT-IR Spectrum**

**11. NMR Spectra**

**12. Mass Spectra**

**13. References**

## 1. Materials and Instruments

All commercially available reagents and chemicals were used as received without further purification.  $^1\text{H}$  NMR spectra were measured on a JEOL 400 MHz FT-400 NMR spectrometer. Mass spectra were obtained with a Bruker microflex mass spectrometer in MALDI-TOF mode. Thermogravimetric analysis (TGA) analysis was performed on a USA Waters Q600 under nitrogen atmosphere at a heating rate of  $10\text{ }^\circ\text{C min}^{-1}$  and Differential scanning calorimetry (DSC) analysis was carried out on METTLER TOLEDO DSC at a heating rate of  $10\text{ }^\circ\text{C min}^{-1}$ . X-ray diffraction patterns were collected using an X-ray diffractometer from Rigaku Japan. The data collection from single crystal was conducted using a Bruker D8 venture diffractometer, equipped with graphite-monochromated Cu K  $\alpha$  radiation ( $\lambda = 1.54178\text{ \AA}$ ). Cyclic voltammetry (CV) were performed on a BAS 100W Bioanalytical Systems, using a platinum wire as the auxiliary electrode, a glass carbon disk as the working electrode and a silver/Silver chloride ( $\text{Ag}/\text{Ag}^+$ ) as the reference electrode, standardized for the redox couple ferricinium/ferrocene ( $\text{Fc}/\text{Fc}^+$ ). Absorption spectrum were measured on a PerkinElmer UV-Lambda 950 spectrophotometer. Photoluminescence spectra were recorded on a Shimadzu F-7000 spectrofluorometer. Absolute PL quantum yields were measured with a Japan Hamamatsu C9920-06G. Fluorescence lifetimes were determined with a Edinburgh FLS1000

Quantaurs-Tau time-resolved spectrometer. The frontier orbitals of the molecules based on the ground state geometries were calculated at B3LYP/6-31G\* by Gaussian 16 program.

## 2. Synthesis and Characterization

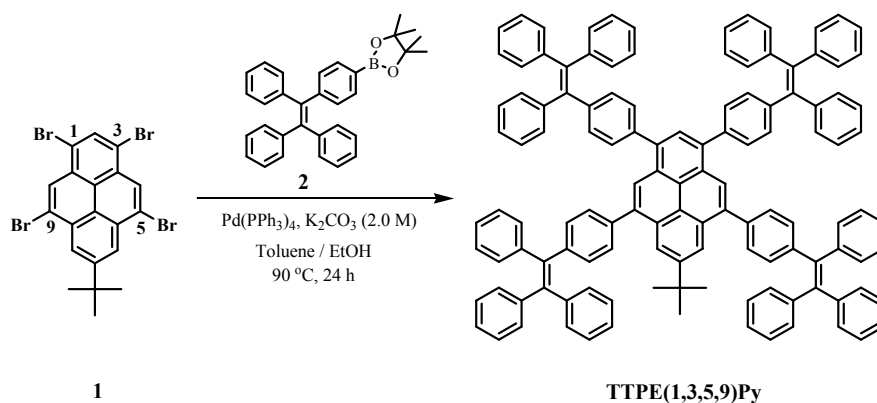

**Scheme S1.** The synthetic route of the target compound **TTPE(1,3,5,9)Py**.

**Synthesis of TTPE(1,3,5,9)Py:** To a mixture of 1,3,5,9-tetrabromo-7-*tert*-butylpyrene<sup>[S1]</sup> (1.40 g, 2.00 mmol), 4-(1,2,2-Triphenylvinyl)phenyl boronic acid (5.50 g, 12 mmol), Pd(PPh<sub>3</sub>)<sub>4</sub> (0.32 g, 0.28 mmol), and potassium carbonate (3.80 g, 27.50 mmol) in degassed toluene/ethanol (120 mL/30 mL) and sodium carbonate solution (30 mL, 2 M) was heated to reflux for 24 h under nitrogen. The precipitate was purified by column chromatography, recrystallization and sublimation, obtained yellow solid in 42.8% yield (1.21g, 0.85 mmol). <sup>1</sup>H NMR (400 MHz, CDCl<sub>3</sub>): δ (ppm) 8.18 (s, 2H), 7.98 (s, 2H), 7.84 (s, 1H), 7.35 (dd, *J* = 8.1, 3.8 Hz, 10H), 7.22 (s, 4H), 7.19 (d, *J* = 4.1 Hz, 12H), 7.16 (s, 2H), 7.12 (t, *J* = 6.5 Hz, 32H), 7.08–7.04 (m, 10H), 6.98 (d, *J* = 7.5 Hz, 4H), 6.81 (t, *J* = 7.3 Hz,

2H), 1.37 (s, 9H). MS (MALDI-TOF):  $m/z$  calcd. for  $[C_{124}H_{90}]^+$ , 1580.04; found 1580.5881. Anal. calcd. for  $C_{124}H_{90}$ : C, 94.17; H, 5.83%. Found: C, 94.15; H, 5.84%.

### 3. Device Fabrication

Commercial ITO glass substrate was pre-cleaned carefully with alkaline detergent, boiled deionized water, and deionized water thoroughly in ultrasonic bath and then treated with UV/O<sub>3</sub> for 2 min. **TTPE(1,3,5,9)Py** emitter was purified by and vacuum sublimation. All the organic layers were deposited onto the ITO-coated substrates by high-vacuum ( $1 \times 10^{-5}$  Pa) thermal evaporation.<sup>[S2-S3]</sup> The active area of each device was 9 mm<sup>2</sup>. The thicknesses of the organic materials and the cathode layers were controlled using a quartz-crystal thickness monitor. The electroluminescence spectra, the current density-voltage characteristics and the current density-voltage-luminance curves characterizations of the OLEDs were carried out with a Photo Research SpectraScan PR-650 Spectroradiometer and a Keithley 2400 Source Meter and they are recorded simultaneously. All measurements were carried out on the devices without encapsulations in ambient atmosphere in the dark.

#### 4. Thermal Properties

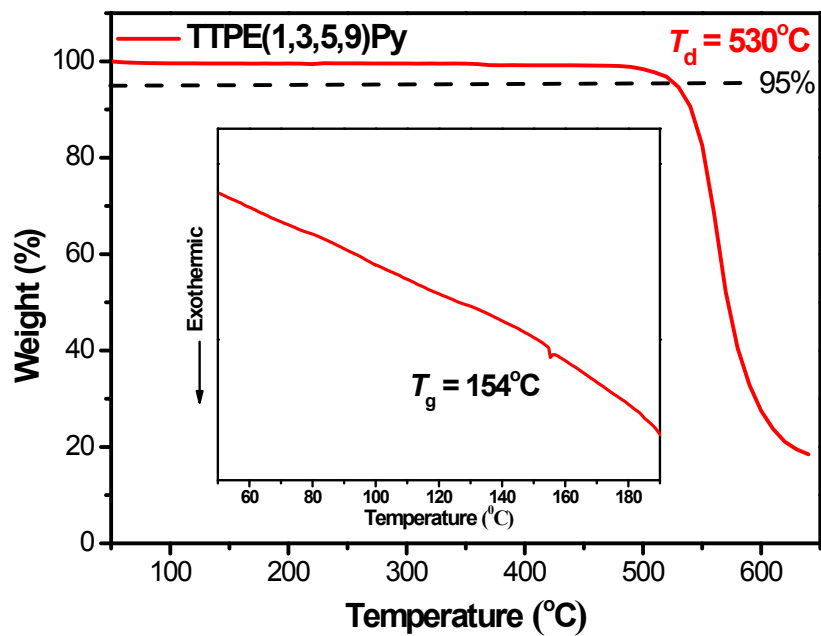

Fig. S1 TGA and DSC thermograms of TTPE(1,3,5,9)Py.

## 5. DFT Calculations

**Table S1** Atom coordinates and absolute energies for **TTPE(1,3,5,9)Py** Standard orientation.

| Center Number | Atomic Number | Atomic Type | Coordinates (Angstroms) |           |           |
|---------------|---------------|-------------|-------------------------|-----------|-----------|
|               |               |             | X                       | Y         | Z         |
| 1             | 6             | 0           | -0.164369               | -4.132581 | 0.528643  |
| 2             | 6             | 0           | 1.063235                | -3.468743 | 0.550770  |
| 3             | 6             | 0           | 1.164765                | -2.069547 | 0.446686  |
| 4             | 6             | 0           | -0.028726               | -1.284739 | 0.380571  |
| 5             | 6             | 0           | -1.294278               | -1.955561 | 0.368382  |
| 6             | 6             | 0           | -1.324377               | -3.356171 | 0.417776  |
| 7             | 6             | 0           | 2.448691                | -1.393376 | 0.417663  |
| 8             | 6             | 0           | 0.039429                | 0.143338  | 0.322846  |
| 9             | 6             | 0           | 1.312666                | 0.791859  | 0.361302  |
| 10            | 6             | 0           | 2.489231                | -0.024784 | 0.391806  |
| 11            | 6             | 0           | 1.368808                | 2.208568  | 0.301814  |
| 12            | 6             | 0           | 0.174915                | 2.925934  | 0.183299  |
| 13            | 6             | 0           | -1.085428               | 2.319708  | 0.157429  |
| 14            | 6             | 0           | -1.165843               | 0.905528  | 0.221090  |
| 15            | 6             | 0           | -2.412934               | 0.200582  | 0.167307  |
| 16            | 6             | 0           | -2.505765               | -1.161157 | 0.261797  |
| 17            | 1             | 0           | -3.325432               | 0.777763  | 0.072753  |
| 18            | 1             | 0           | 1.979213                | -4.035341 | 0.647363  |
| 19            | 1             | 0           | -2.289055               | -3.846519 | 0.367471  |
| 20            | 1             | 0           | 3.454897                | 0.464966  | 0.340244  |
| 21            | 1             | 0           | 0.224700                | 4.010906  | 0.166932  |
| 22            | 6             | 0           | 7.566127                | -4.181564 | 0.270262  |
| 23            | 6             | 0           | 8.321174                | -4.308545 | -0.861819 |
| 24            | 6             | 0           | 6.255001                | -3.465554 | 0.290559  |
| 25            | 6             | 0           | 5.255826                | -3.730692 | -0.661759 |
| 26            | 6             | 0           | 5.958878                | -2.538999 | 1.304566  |
| 27            | 6             | 0           | 4.023590                | -3.085804 | -0.612702 |
| 28            | 1             | 0           | 5.453033                | -4.447089 | -1.453063 |
| 29            | 6             | 0           | 4.731537                | -1.882619 | 1.344857  |
| 30            | 1             | 0           | 6.702249                | -2.330501 | 2.068865  |
| 31            | 6             | 0           | 3.736328                | -2.143091 | 0.389443  |
| 32            | 1             | 0           | 3.276926                | -3.302813 | -1.371350 |
| 33            | 1             | 0           | 4.530214                | -1.166595 | 2.137043  |
| 34            | 6             | 0           | 7.989124                | -4.745613 | 1.589149  |
| 35            | 6             | 0           | 7.087032                | -5.489281 | 2.370346  |
| 36            | 6             | 0           | 9.271353                | -4.501472 | 2.109490  |
| 37            | 6             | 0           | 7.464149                | -5.998499 | 3.611959  |
| 38            | 1             | 0           | 6.084115                | -5.671320 | 1.994242  |

|    |   |   |           |           |           |
|----|---|---|-----------|-----------|-----------|
| 39 | 6 | 0 | 9.645287  | -5.000288 | 3.356435  |
| 40 | 1 | 0 | 9.975850  | -3.914271 | 1.528719  |
| 41 | 6 | 0 | 8.745658  | -5.755733 | 4.110965  |
| 42 | 1 | 0 | 6.754102  | -6.581714 | 4.192740  |
| 43 | 1 | 0 | 10.641056 | -4.794488 | 3.740578  |
| 44 | 1 | 0 | 9.037952  | -6.145806 | 5.082318  |
| 45 | 6 | 0 | 8.043493  | -3.531474 | -2.108576 |
| 46 | 6 | 0 | 7.860961  | -2.138501 | -2.075278 |
| 47 | 6 | 0 | 8.015060  | -4.174524 | -3.358801 |
| 48 | 6 | 0 | 7.636263  | -1.417360 | -3.246954 |
| 49 | 1 | 0 | 7.897860  | -1.621681 | -1.121358 |
| 50 | 6 | 0 | 7.778630  | -3.455678 | -4.529467 |
| 51 | 1 | 0 | 8.175046  | -5.248022 | -3.407352 |
| 52 | 6 | 0 | 7.588188  | -2.073165 | -4.478632 |
| 53 | 1 | 0 | 7.501546  | -0.339996 | -3.196950 |
| 54 | 1 | 0 | 7.747649  | -3.975862 | -5.483430 |
| 55 | 1 | 0 | 7.410646  | -1.510991 | -5.391603 |
| 56 | 6 | 0 | 9.491418  | -5.234686 | -0.951729 |
| 57 | 6 | 0 | 9.391216  | -6.579309 | -0.555802 |
| 58 | 6 | 0 | 10.711313 | -4.792221 | -1.493510 |
| 59 | 6 | 0 | 10.477308 | -7.444734 | -0.677496 |
| 60 | 1 | 0 | 8.452007  | -6.944357 | -0.152115 |
| 61 | 6 | 0 | 11.801428 | -5.653865 | -1.604023 |
| 62 | 1 | 0 | 10.802113 | -3.761579 | -1.824919 |
| 63 | 6 | 0 | 11.689091 | -6.984888 | -1.196643 |
| 64 | 1 | 0 | 10.374573 | -8.482018 | -0.369314 |
| 65 | 1 | 0 | 12.738651 | -5.286084 | -2.013850 |
| 66 | 1 | 0 | 12.536134 | -7.659407 | -1.289802 |
| 67 | 6 | 0 | -0.281646 | -5.666546 | 0.609796  |
| 68 | 6 | 0 | -1.151972 | -6.055111 | 1.828679  |
| 69 | 6 | 0 | -0.946209 | -6.197364 | -0.683088 |
| 70 | 6 | 0 | 1.088396  | -6.354066 | 0.762725  |
| 71 | 1 | 0 | -0.702097 | -5.695831 | 2.761370  |
| 72 | 1 | 0 | -2.161212 | -5.635959 | 1.760722  |
| 73 | 1 | 0 | -1.248105 | -7.145797 | 1.896036  |
| 74 | 1 | 0 | -0.343879 | -5.947184 | -1.563927 |
| 75 | 1 | 0 | -1.047662 | -7.288863 | -0.639022 |
| 76 | 1 | 0 | -1.945284 | -5.774016 | -0.831099 |
| 77 | 1 | 0 | 0.951006  | -7.439859 | 0.819751  |
| 78 | 1 | 0 | 1.747318  | -6.149117 | -0.088476 |
| 79 | 1 | 0 | 1.603610  | -6.037317 | 1.676663  |
| 80 | 6 | 0 | 2.644881  | 2.973568  | 0.378801  |
| 81 | 6 | 0 | 2.960825  | 3.921646  | -0.608570 |
| 82 | 6 | 0 | 3.532814  | 2.817255  | 1.457051  |



|     |   |   |            |           |           |
|-----|---|---|------------|-----------|-----------|
| 83  | 6 | 0 | 4.128024   | 4.680846  | -0.527356 |
| 84  | 1 | 0 | 2.288438   | 4.050208  | -1.452598 |
| 85  | 6 | 0 | 4.699400   | 3.576937  | 1.539619  |
| 86  | 1 | 0 | 3.293018   | 2.108127  | 2.244386  |
| 87  | 6 | 0 | 5.002862   | 4.510670  | 0.546892  |
| 88  | 1 | 0 | 4.355484   | 5.403443  | -1.306853 |
| 89  | 1 | 0 | 5.368218   | 3.444621  | 2.386175  |
| 90  | 6 | 0 | -2.285799  | 3.200426  | 0.084785  |
| 91  | 6 | 0 | -3.290001  | 3.161098  | 1.067318  |
| 92  | 6 | 0 | -2.406875  | 4.141637  | -0.950910 |
| 93  | 6 | 0 | -4.381629  | 4.027218  | 1.009446  |
| 94  | 1 | 0 | -3.201540  | 2.458184  | 1.890880  |
| 95  | 6 | 0 | -3.498988  | 5.007351  | -1.009929 |
| 96  | 1 | 0 | -1.641443  | 4.181318  | -1.721394 |
| 97  | 6 | 0 | -4.491703  | 4.952556  | -0.030296 |
| 98  | 1 | 0 | -5.143426  | 3.983774  | 1.783528  |
| 99  | 1 | 0 | -3.575468  | 5.722797  | -1.824666 |
| 100 | 6 | 0 | -8.394265  | -4.131633 | -0.826496 |
| 101 | 6 | 0 | -7.860968  | -3.462327 | 0.238928  |
| 102 | 6 | 0 | -7.567445  | -4.590652 | -1.984666 |
| 103 | 6 | 0 | -6.382302  | -5.320479 | -1.790773 |
| 104 | 6 | 0 | -7.990015  | -4.350591 | -3.304041 |
| 105 | 6 | 0 | -5.634714  | -5.774563 | -2.876265 |
| 106 | 1 | 0 | -6.050691  | -5.532549 | -0.779022 |
| 107 | 6 | 0 | -7.236639  | -4.793816 | -4.389937 |
| 108 | 1 | 0 | -8.914867  | -3.806591 | -3.474530 |
| 109 | 6 | 0 | -6.055000  | -5.508072 | -4.180793 |
| 110 | 1 | 0 | -4.723605  | -6.341337 | -2.702032 |
| 111 | 1 | 0 | -7.575668  | -4.584643 | -5.401303 |
| 112 | 1 | 0 | -5.470793  | -5.859940 | -5.026918 |
| 113 | 6 | 0 | -9.848378  | -4.463808 | -0.926761 |
| 114 | 6 | 0 | -10.261340 | -5.755439 | -1.299003 |
| 115 | 6 | 0 | -10.836853 | -3.488312 | -0.711733 |
| 116 | 6 | 0 | -11.614221 | -6.069021 | -1.419088 |
| 117 | 1 | 0 | -9.511487  | -6.517999 | -1.490125 |
| 118 | 6 | 0 | -12.189598 | -3.798158 | -0.843559 |
| 119 | 1 | 0 | -10.537073 | -2.480558 | -0.441724 |
| 120 | 6 | 0 | -12.584940 | -5.091080 | -1.192138 |
| 121 | 1 | 0 | -11.910324 | -7.077767 | -1.695417 |
| 122 | 1 | 0 | -12.936093 | -3.025771 | -0.677305 |
| 123 | 1 | 0 | -13.639708 | -5.332666 | -1.293282 |
| 124 | 6 | 0 | -6.476885  | -2.899885 | 0.225006  |
| 125 | 6 | 0 | -6.020453  | -2.097485 | -0.833062 |
| 126 | 6 | 0 | -5.604291  | -3.111340 | 1.307325  |

|     |   |   |            |           |           |
|-----|---|---|------------|-----------|-----------|
| 127 | 6 | 0 | -4.739146  | -1.551792 | -0.822105 |
| 128 | 1 | 0 | -6.678035  | -1.902816 | -1.674515 |
| 129 | 6 | 0 | -4.318252  | -2.579358 | 1.311216  |
| 130 | 1 | 0 | -5.941728  | -3.700519 | 2.155492  |
| 131 | 6 | 0 | -3.857581  | -1.789039 | 0.243839  |
| 132 | 1 | 0 | -4.409189  | -0.937841 | -1.655672 |
| 133 | 1 | 0 | -3.667283  | -2.758559 | 2.162601  |
| 134 | 6 | 0 | -8.613765  | -3.235938 | 1.510865  |
| 135 | 6 | 0 | -9.266551  | -4.291136 | 2.170496  |
| 136 | 6 | 0 | -8.635651  | -1.964296 | 2.110571  |
| 137 | 6 | 0 | -9.934728  | -4.078424 | 3.375336  |
| 138 | 1 | 0 | -9.245413  | -5.283960 | 1.732040  |
| 139 | 6 | 0 | -9.313683  | -1.748382 | 3.309236  |
| 140 | 1 | 0 | -8.119359  | -1.140108 | 1.626272  |
| 141 | 6 | 0 | -9.966267  | -2.805201 | 3.947502  |
| 142 | 1 | 0 | -10.428388 | -4.910977 | 3.869932  |
| 143 | 1 | 0 | -9.328026  | -0.753895 | 3.747871  |
| 144 | 1 | 0 | -10.488522 | -2.639399 | 4.886054  |
| 145 | 6 | 0 | 6.355346   | 4.698874  | 0.653873  |
| 146 | 6 | 0 | 6.882219   | 5.740632  | -0.034394 |
| 147 | 6 | 0 | 8.402759   | 5.816633  | -0.266304 |
| 148 | 6 | 0 | 8.965220   | 5.233693  | -1.401808 |
| 149 | 6 | 0 | 9.217637   | 6.469118  | 0.659248  |
| 150 | 6 | 0 | 10.342747  | 5.302861  | -1.611825 |
| 151 | 1 | 0 | 8.322981   | 4.719692  | -2.131516 |
| 152 | 6 | 0 | 10.594899  | 6.537897  | 0.449587  |
| 153 | 1 | 0 | 8.773832   | 6.929004  | 1.554243  |
| 154 | 6 | 0 | 11.157634  | 5.954256  | -0.686154 |
| 155 | 1 | 0 | 10.785964  | 4.842515  | -2.506745 |
| 156 | 1 | 0 | 11.237601  | 7.051496  | 1.179276  |
| 157 | 1 | 0 | 12.243499  | 6.008271  | -0.851307 |
| 158 | 6 | 0 | 7.271947   | 3.590798  | 1.204880  |
| 159 | 6 | 0 | 7.813792   | 3.706064  | 2.484984  |
| 160 | 6 | 0 | 7.559909   | 2.471308  | 0.423708  |
| 161 | 6 | 0 | 8.643979   | 2.701978  | 2.984056  |
| 162 | 1 | 0 | 7.586608   | 4.588228  | 3.100871  |
| 163 | 6 | 0 | 8.390270   | 1.467648  | 0.922412  |
| 164 | 1 | 0 | 7.132214   | 2.380501  | -0.585403 |
| 165 | 6 | 0 | 8.932744   | 1.583234  | 2.202872  |
| 166 | 1 | 0 | 9.071621   | 2.793515  | 3.993009  |
| 167 | 1 | 0 | 8.618046   | 0.585440  | 0.306683  |
| 168 | 1 | 0 | 9.587603   | 0.792060  | 2.595937  |
| 169 | 6 | 0 | 5.965618   | 6.848709  | -0.585401 |
| 170 | 6 | 0 | 5.424572   | 6.733915  | -1.865885 |

|     |   |   |            |          |           |
|-----|---|---|------------|----------|-----------|
| 171 | 6 | 0 | 5.675993   | 7.967217 | 0.196563  |
| 172 | 6 | 0 | 4.594022   | 7.737786 | -2.364784 |
| 173 | 1 | 0 | 5.652533   | 5.852209 | -2.482142 |
| 174 | 6 | 0 | 4.846032   | 8.971112 | -0.302331 |
| 175 | 1 | 0 | 6.102396   | 8.057261 | 1.206289  |
| 176 | 6 | 0 | 4.305180   | 8.856484 | -1.583563 |
| 177 | 1 | 0 | 4.168249   | 7.647352 | -3.374626 |
| 178 | 1 | 0 | 4.618101   | 9.853230 | 0.313471  |
| 179 | 1 | 0 | 3.651045   | 9.648086 | -1.976973 |
| 180 | 6 | 0 | -6.929954  | 4.604374 | 0.767746  |
| 181 | 6 | 0 | -5.954000  | 5.155686 | 0.006080  |
| 182 | 6 | 0 | -8.327849  | 4.364076 | 0.167958  |
| 183 | 6 | 0 | -9.303858  | 5.356745 | 0.254914  |
| 184 | 6 | 0 | -8.618074  | 3.153763 | -0.462378 |
| 185 | 6 | 0 | -10.570415 | 5.139165 | -0.288192 |
| 186 | 1 | 0 | -9.075083  | 6.310835 | 0.751419  |
| 187 | 6 | 0 | -9.884453  | 2.935982 | -1.004959 |
| 188 | 1 | 0 | -7.848207  | 2.371427 | -0.531151 |
| 189 | 6 | 0 | -10.861019 | 3.928900 | -0.917499 |
| 190 | 1 | 0 | -11.339902 | 5.921672 | -0.218795 |
| 191 | 1 | 0 | -10.113797 | 1.981834 | -1.501243 |
| 192 | 1 | 0 | -11.859506 | 3.757087 | -1.345052 |
| 193 | 6 | 0 | -6.645896  | 4.217355 | 2.231005  |
| 194 | 6 | 0 | -6.175043  | 2.940319 | 2.536004  |
| 195 | 6 | 0 | -6.859059  | 5.144415 | 3.251560  |
| 196 | 6 | 0 | -5.917552  | 2.589986 | 3.861687  |
| 197 | 1 | 0 | -6.006693  | 2.209688 | 1.731653  |
| 198 | 6 | 0 | -6.602103  | 4.794082 | 4.576995  |
| 199 | 1 | 0 | -7.229920  | 6.151363 | 3.010742  |
| 200 | 6 | 0 | -6.131536  | 3.516324 | 4.882144  |
| 201 | 1 | 0 | -5.547079  | 1.582864 | 4.101888  |
| 202 | 1 | 0 | -6.770690  | 5.524317 | 5.381751  |
| 203 | 1 | 0 | -5.929198  | 3.240055 | 5.927147  |
| 204 | 6 | 0 | -6.238058  | 5.542705 | -1.457179 |
| 205 | 6 | 0 | -6.710058  | 6.819346 | -1.762060 |
| 206 | 6 | 0 | -6.022726  | 4.616392 | -2.477957 |
| 207 | 6 | 0 | -6.967119  | 7.169826 | -3.087787 |
| 208 | 1 | 0 | -6.879486  | 7.549605 | -0.957598 |
| 209 | 6 | 0 | -6.280154  | 4.966562 | -3.803343 |
| 210 | 1 | 0 | -5.650179  | 3.610026 | -2.237313 |
| 211 | 6 | 0 | -6.752842  | 6.243590 | -4.108274 |
| 212 | 1 | 0 | -7.339959  | 8.176133 | -3.327744 |
| 213 | 1 | 0 | -6.111225  | 4.236446 | -4.608134 |
| 214 | 1 | 0 | -6.956034  | 6.519564 | -5.153189 |

---

## 6. X-ray crystallography

Table S2 Summary of crystal data for TTPE(1,3,5,9)Py.

| Parameters                        | TTPE(1,3,5,9)Py                                                                                                         |
|-----------------------------------|-------------------------------------------------------------------------------------------------------------------------|
| Empirical formula                 | C <sub>124</sub> H <sub>90</sub>                                                                                        |
| Formula weight                    | 1579.95                                                                                                                 |
| Temperature/K                     | 153(2)                                                                                                                  |
| Crystal system                    | monoclinic                                                                                                              |
| Space group                       | P2 <sub>1</sub> /n                                                                                                      |
| Unit cell dimensions              | a=15.5495(8)Å, α=90.00 <sup>0</sup><br>b=38.2440(19)Å, β=105.124(2) <sup>0</sup><br>c=15.8621(8)Å, γ=90.00 <sup>0</sup> |
| Z                                 | 4                                                                                                                       |
| Density (calculated)              | 1.152 g/cm <sup>3</sup>                                                                                                 |
| Volume                            | 9106.1(8) Å <sup>3</sup>                                                                                                |
| F(000)                            | 3336.0                                                                                                                  |
| Theta range for data collection   | 7.396 <sup>0</sup> to 136.906 <sup>0</sup>                                                                              |
| Index ranges                      | -18 ≤ h ≤ 18<br>-46 ≤ k ≤ 46<br>-18 ≤ l ≤ 19                                                                            |
| Reflections collected             | 94866                                                                                                                   |
| Independent reflections           | 16618<br>[R <sub>int</sub> = 0.0519, R <sub>sigma</sub> = 0.0324]                                                       |
| Data/restraints/parameters        | 16618/6616/1259                                                                                                         |
| Goodness-of-fit on F <sup>2</sup> | 1.170                                                                                                                   |
| Final R indexes [I ≥ 2σ (I)]      | R <sub>1</sub> = 0.1894, wR <sub>2</sub> = 0.3239                                                                       |
| Final R indexes [all data]        | R <sub>1</sub> = 0.2220, wR <sub>2</sub> = 0.3342                                                                       |
| Largest diff. Peak/hole           | 1.53/-0.63 e Å <sup>-3</sup>                                                                                            |

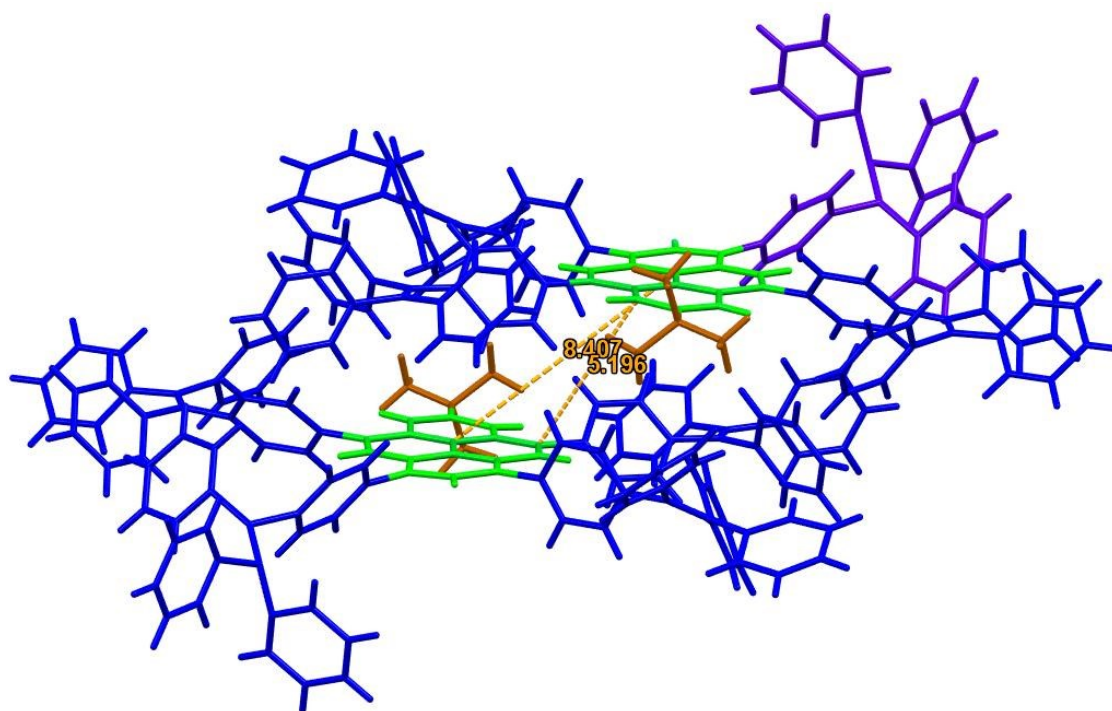

**Fig. S2** Packing distances and conformations in TTPE(1,3,5,9)Py: The shortest contact between pyrene ring and a substituent on a neighboring molecule is 5.196 Å, and the centroid···centroid distance is 8.407 Å.

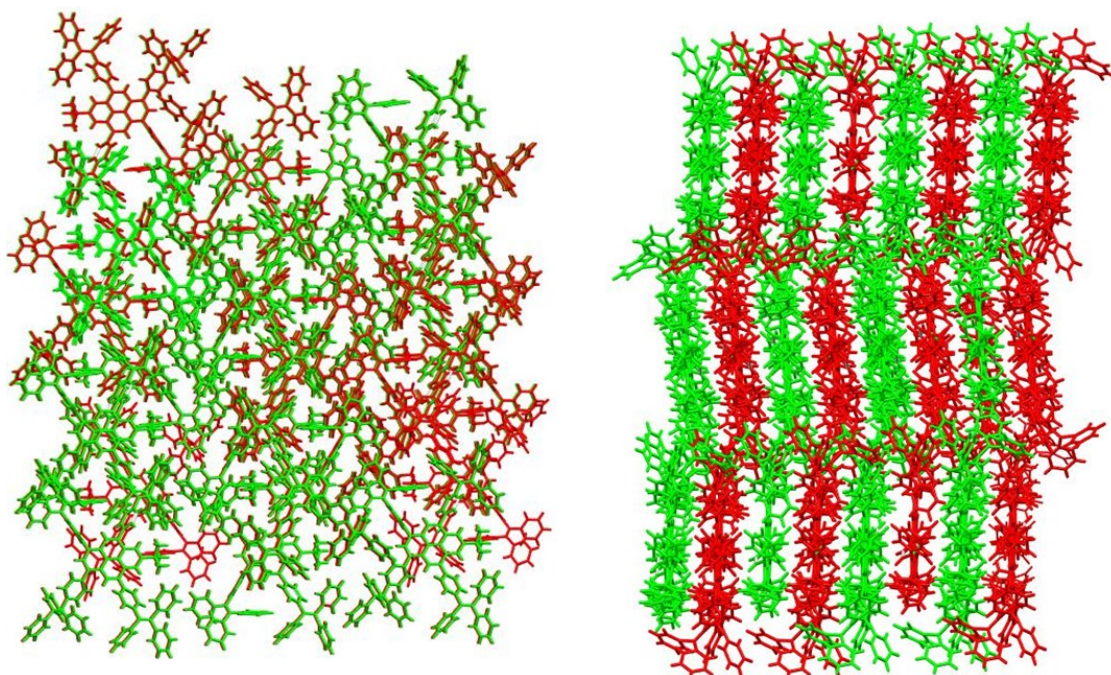

**Fig. S3** Packing plots for TTPE(1,3,5,9)Py: Top view (left) and side view (right).

## 7. Photophysical Properties

**Table S3** Photophysical properties of **TTPE(1,3,5,9)Py**.

|                        | $\Phi_F^c$ [%]    |                   |        | $\tau^d$ [ns]     |                   |        | $k_r/k_{nr} (\times 10^8 \text{ s}^{-1})$ |                   |         |
|------------------------|-------------------|-------------------|--------|-------------------|-------------------|--------|-------------------------------------------|-------------------|---------|
|                        | soln <sup>a</sup> | film <sup>b</sup> | powder | soln <sup>a</sup> | film <sup>b</sup> | powder | soln <sup>a</sup>                         | film <sup>b</sup> | powder  |
| <b>TTPE(1,3,5,9)Py</b> | 2%                | 78%               | 61%    | 0.43              | 2.22              | 2.69   | 0.5/22.5                                  | 3.5/1.0           | 2.3/1.4 |

<sup>a</sup>In THF,  $1.0 \times 10^{-5}$  M. <sup>b</sup>Evaporated film on quartz plate. <sup>c</sup>Fluorescence quantum yield.

<sup>d</sup>Fluorescence lifetime, measured at room temperature in air. The radiative decay rate,  $k_r = \Phi_F / \tau$ .

The nonradiative decay rate,  $k_{nr} = 1/\tau - k_r$ .

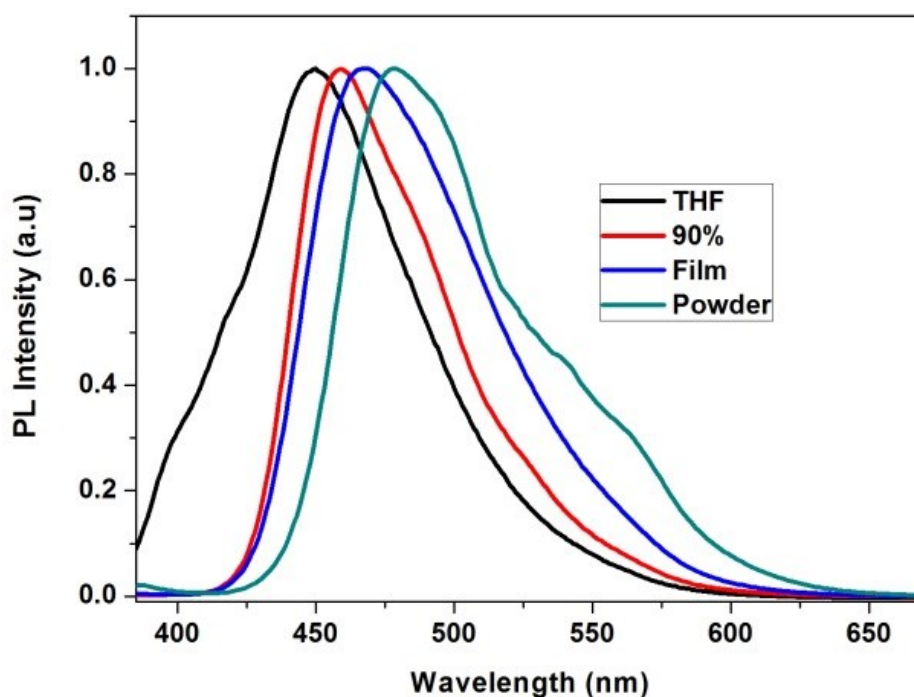

**Fig. S4** The PL spectrum of **TTPE(1,3,5,9)Py** in different states: (a) THF: concentration in THF solution,  $1.0 \times 10^{-5}$  M, (b) 90%: in THF/water mixtures, the water fraction is 90%, (c) film: 50 nm, made by vacuum thermal evaporation.

## 8. Photoelectron Yield Spectroscopy (PESA) Spectra

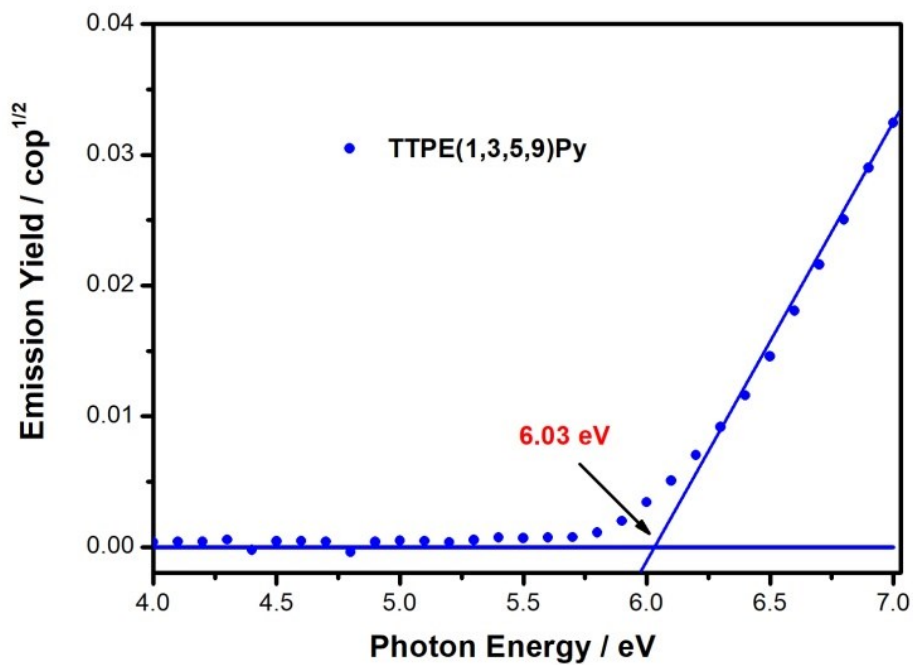

**Fig. S5** PESA spectra of TTPE(1,3,5,9)Py film on evaporated film on precleaned ITO substrates.

## 9. Device performance

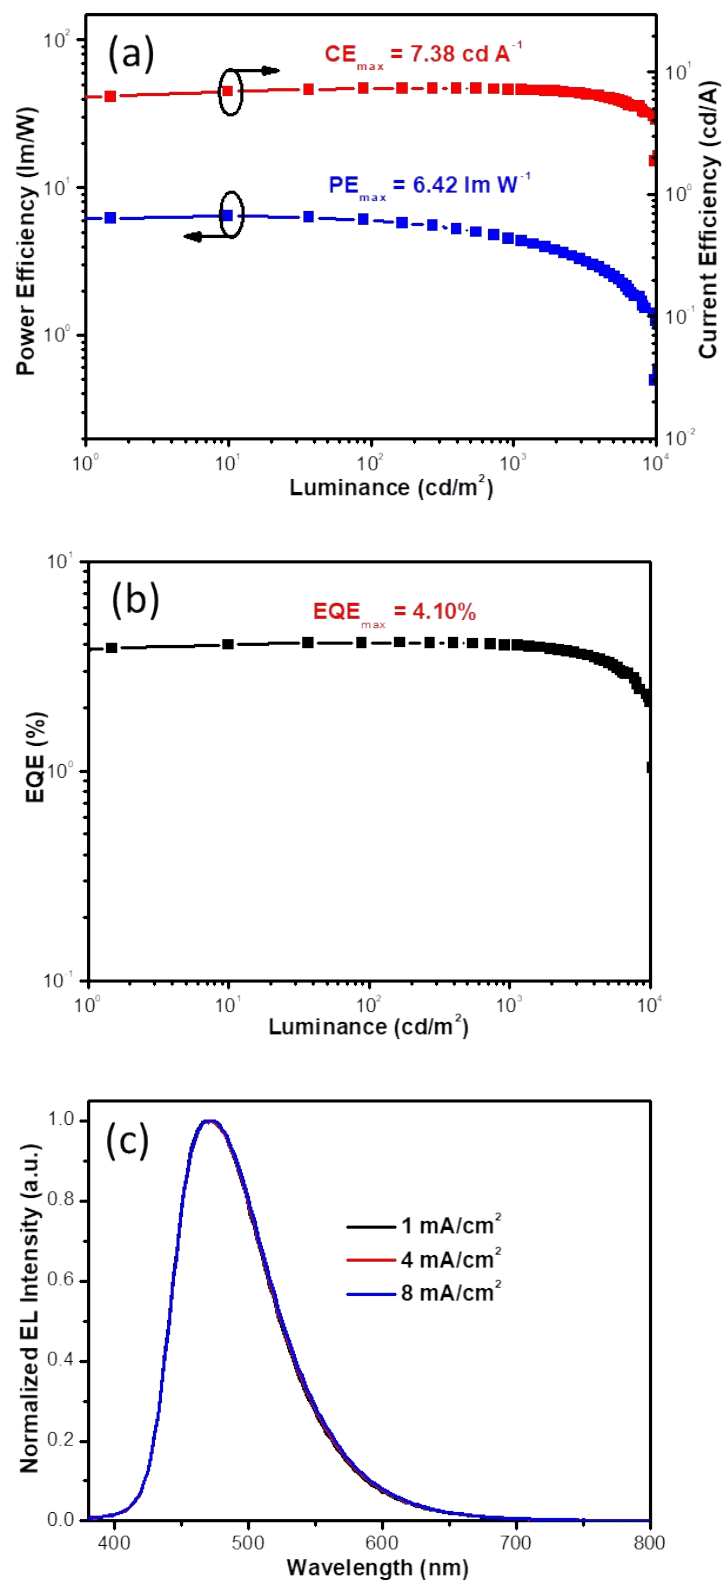

**Fig. S6** (a) Current efficiency–luminance–power efficiency, and (b) external quantum efficiency with luminance characteristics, and (c) EL spectra stability of OLED under different current densities of TTPE(1,3,5,9)Py.



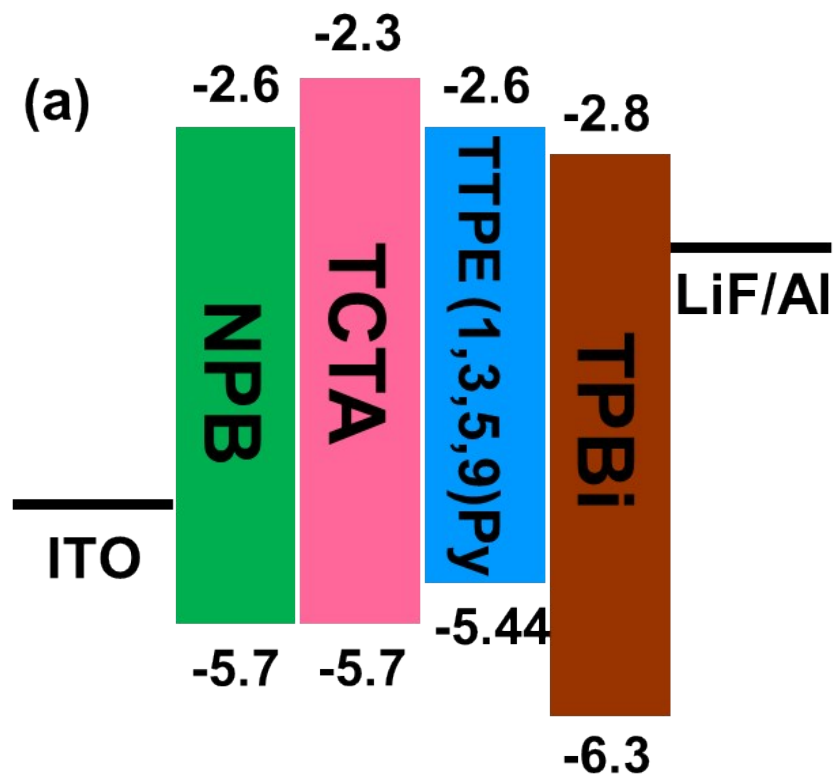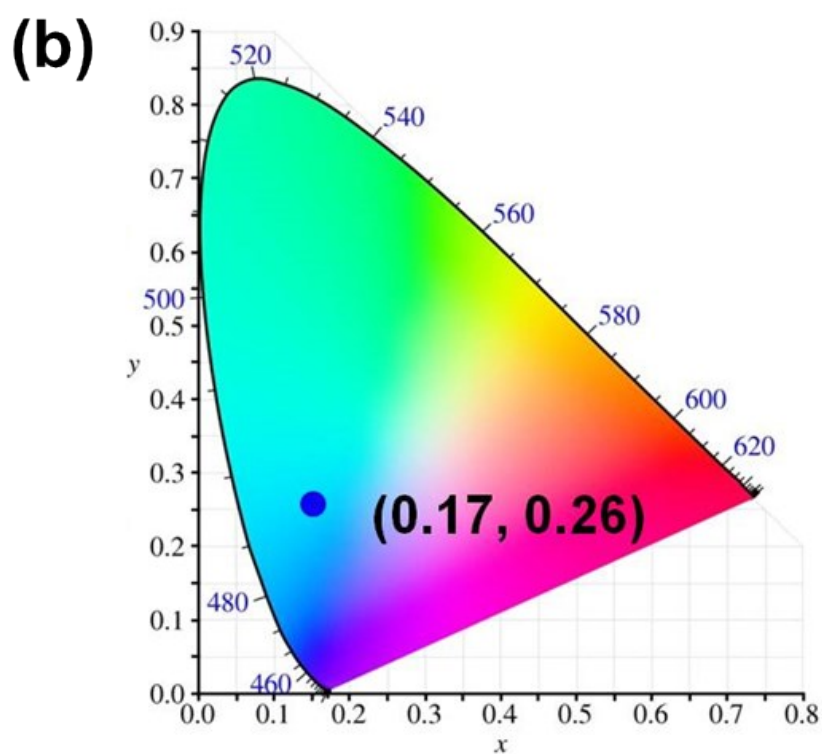

**Fig. S7** (a) Energy level diagrams and device configurations of TTPE(1,3,5,9)Py; (b) Commission Internationale de l'Eclairage (CIE) chromaticity coordinate of the device.

**Table S4** Summary of representative performances of OLEDs using pyrene-based AIEgens.

| Emitter                                                                             | $V_{\text{on}}$<br>(v) | $L_{\text{max}}$<br>(cd m <sup>-2</sup> ) | $\eta_{\text{C,max}}$<br>(cd A <sup>-1</sup> ) | $\eta_{\text{P,max}}$<br>(lm W <sup>-1</sup> ) | $\lambda_{\text{EL}}$<br>(nm) | CIE<br>(x,y) | EQE<br>(%) | Year/Ref.  |
|-------------------------------------------------------------------------------------|------------------------|-------------------------------------------|------------------------------------------------|------------------------------------------------|-------------------------------|--------------|------------|------------|
| 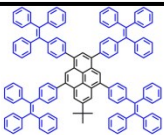   | 3.2                    | 11849                                     | 7.38                                           | 6.42                                           | 468                           | (0.17,0.26)  | 4.10       | This work  |
|    | 3.2                    | 11450                                     | 6.51                                           | 6.24                                           | 488                           | (0.19,0.28)  | 3.35       | 2020/[S4]  |
|    | 3.2                    | 5453                                      | 7.82                                           | 6.40                                           | 484                           | (0.22,0.34)  | 3.66       | 2019/[S5]  |
|    | 4.2                    | 18287                                     | 2.94                                           | 1.79                                           | 448                           | (0.15,0.09)  | 3.46       | 2016/[S6]  |
|   | 4.3                    | 1996                                      | 2.27                                           | 1.37                                           | 452                           | (0.16,0.11)  | 1.70       | 2016/[S6]  |
|  | 4.3                    | 1996                                      | 2.27                                           | 1.37                                           | 452                           | (0.16,0.11)  | 1.70       | 2016/[S7]  |
|  | 3.5                    | 9824                                      | 4.02                                           | 3.08                                           | 436                           | (0.18,0.16)  | 2.50       | 2015/[S8]  |
|  | 3.5                    | 9824                                      | 4.02                                           | 3.08                                           | 436                           | (0.18,0.16)  | 2.50       | 2015/[S9]  |
|  | 4.6                    | 25470                                     | 4.00                                           | 2.70                                           | 504                           | —            | 2.00       | 2011/[S7]  |
|  | 4.9                    | 15546                                     | 6.91                                           | 3.55                                           | 484                           | (0.20,0.29)  | 3.25       | 2010/[S10] |

## 10. FT-IR Spectrum

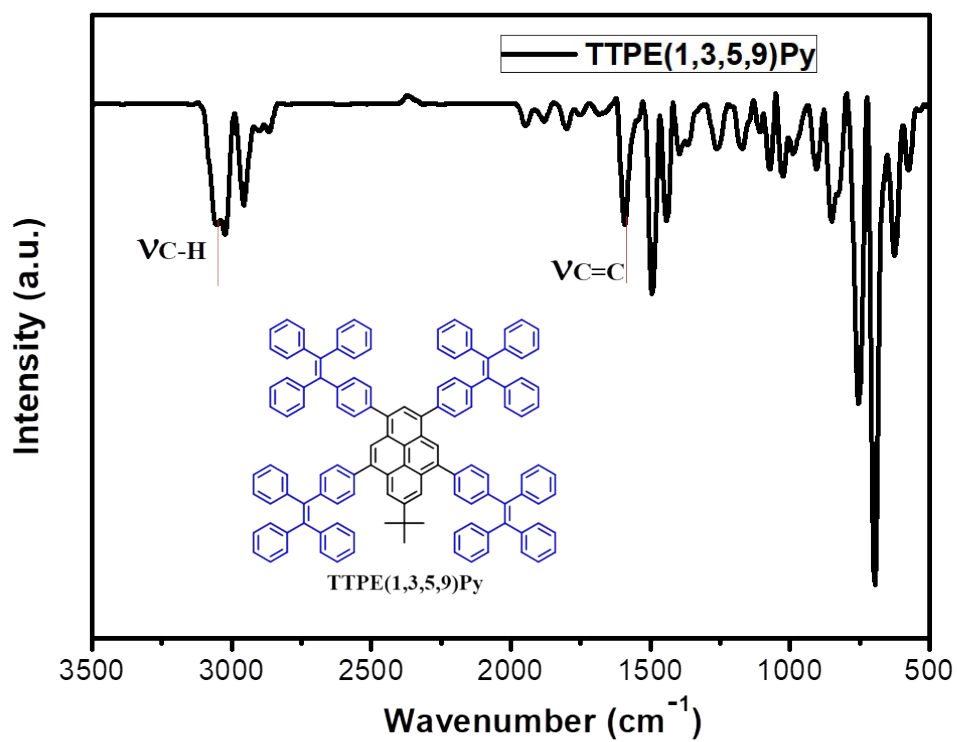

Fig. S8 FT-IR spectra of TTPE(1,3,5,9)Py.

## 11. NMR Spectra

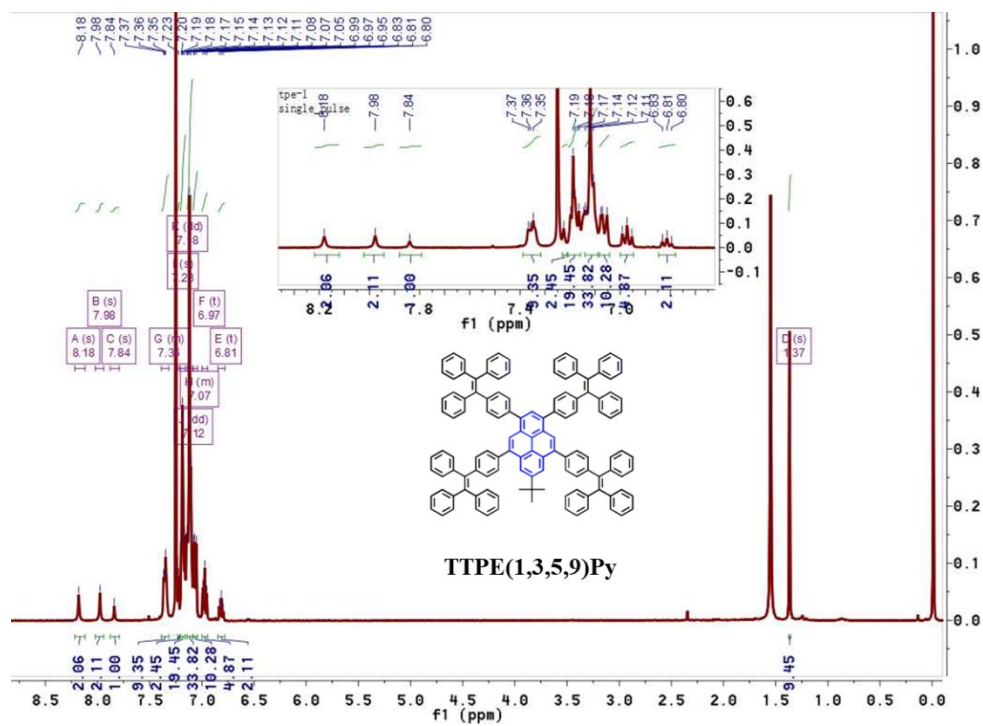

Fig. S9  $^1\text{H}$  NMR spectrum of TTPE(1,3,5,9)Py (400 MHz,  $\text{CDCl}_3$ ).

## 12. Mass Spectra

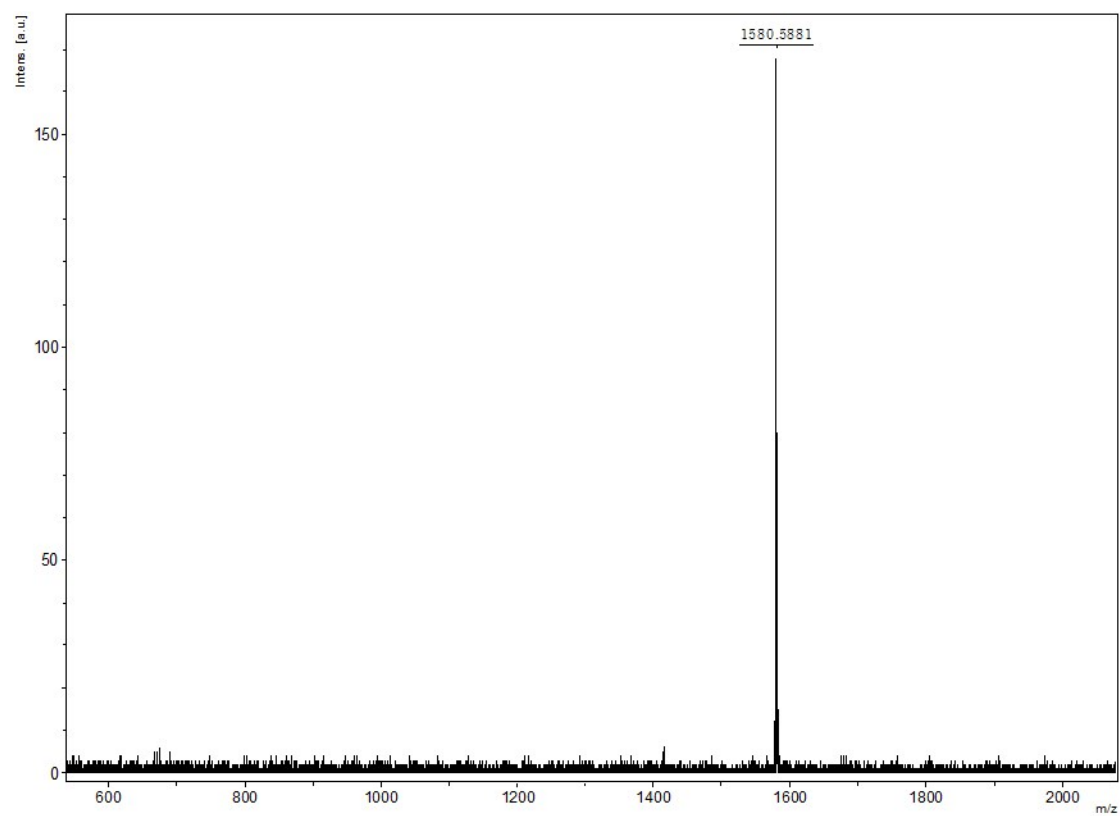

**Fig. S10** MALDI-TOF Mass spectra of TTPE(1,3,5,9)Py.

### 13. References:

- [S1] Feng, X.; Hu, J.-Y.; Iwanaga, F.; Seto, N.; Redshaw, C.; Elsegood, M. R. *Org. Lett.* **2013**, *15*, 1318-1321.
- [S2] Chen, L.; Jiang, Y.; Nie, H.; Hu, R.; Kwok, H. S.; Huang, F.; Qin, A.; Zhao, Z.; Tang, B. Z. *ACS Appl. Mater. Interfaces* **2014**, *6*, 17215–17225.
- [S3] Qin, W.; Yang, Z.; Jiang, Y.; Lam, J. W. Y.; Liang, G.; Kwok, H. S.; Tang, B. Z. *Chem. Mater.* **2015**, *27*, 3892–3901.
- [S4] Yang, X.; Ran, H.; Zhao, Z.; Han, R.; Duan, W.; Hu, J.-Y. *Dyes and Pigments* **2020**, *173*, 107881-107888.
- [S5] Feng, X.; Xu, Z.; Hu, Z.; Qi, C.; Luo, D.; Zhao, X.; Redshaw, C.; Lam, J. W. Y.; Ma, D.; Tang, B. Z. *J. Mater. Chem. C* **2019**, *7*, 2283-2290.
- [S6] Yang, J.; Li, L.; Yu, Y.; Ren, Z.; Peng, Q.; Ye, S. *Materials Chemistry Frontiers* **2016**, *1*, 91-99.
- [S7] Zhao, Z.; Chen, S.; Lam, J. W. Y.; Wang, Z.; Lu, P.; Mahtab, F.; Sung, H. H. Y.; Williams, I. D.; Ma, Y.; Kwok, H. S.; Tang, B. Z. *J Mater Chem.* **2011**, *21*, 7210–7216.
- [S8] Yang, J.; Huang, J.; Sun, N.; Peng, Q.; Li, Q.; Ma, D.; Li, Z. *Chem. Eur. J.* **2015**, *21*, 6862.
- [S9] Yang, J.; Guo, Q.; Wen, X.; Gao, X.; Peng, Q.; Li, Q. *J. Mater. Chem. C* **2016**, *4*, 8506-8513.
- [S10] Zhao, Z.; Chen, S.; Lam, J. W.; Lu, P.; Zhong, Y.; Wong, K. S.; Kwok, H. S.; Tang, B. Z. *Chem Commun.* **2010**, *46*, 2221–2223.
